1

2 **Rcompadre** and **Rage** - two R packages to facilitate the use  
3 of the COMPADRE and COMADRE databases and  
4 calculation of life history traits from matrix population models

5

6

7 Owen R. Jones<sup>1\*</sup>, Patrick Barks<sup>1</sup>, Iain Stott<sup>1,2</sup>, Tamora D. James<sup>3</sup>, Sam Levin<sup>4</sup>, William K.  
8 Petry<sup>5</sup>, Pol Capdevila<sup>6</sup>, Judy Che-Castaldo<sup>7</sup>, John Jackson<sup>1</sup>, Gesa Römer<sup>1</sup>, Caroline Schuette<sup>7</sup>,  
9 Chelsea C. Thomas<sup>7</sup>, Roberto Salguero-Gómez<sup>8,9</sup>

10 <sup>1</sup> University of Southern Denmark, Campusvej 55, 5230 Odense C, Denmark.

11 <sup>2</sup> School of Life Sciences, University of Lincoln, Brayford Pool, Lincoln, LN6 7TS, UK.

12 <sup>3</sup> Department of Animal and Plant Sciences, University of Sheffield, Western Bank, Sheffield S10 2TN, UK.

13 <sup>4</sup> Helmholtz-Centre for Environmental Research – UFZ, Martin Luther University Halle-Wittenberg, Puschstrasse 4, 04103  
14 Leipzig, Germany.

15 <sup>5</sup> Department of Plant and Microbial Biology, North Carolina State University, Raleigh, North Carolina 27607, USA.

16 <sup>6</sup> School of Biological Sciences, University of Bristol, 24 Tyndall Ave, BS8 1TQ, Bristol, UK.

17 <sup>7</sup> Alexander Center for Applied Population Biology, Conservation & Science Department, Lincoln Park Zoo, Chicago,  
18 Illinois 60614, USA.

19 <sup>8</sup> Department of Zoology, University of Oxford, 11a Mansfield Rd, Oxford, OX1 3SZ, UK.

20 <sup>9</sup> Max Planck Institute for Demographic Research, 1 Konrad-Zuße Straße, Rostock, DE 18057, Germany.

21 \* Corresponding author: [jones@biology.sdu.dk](mailto:jones@biology.sdu.dk)

22

## 23 **Summary**

- 24 1. Matrix population models (MPMs) are an important tool for biologists seeking to  
25 understand the causes and consequences of variation in vital rates (e.g., survival,  
26 reproduction) across life cycles. Empirical MPMs describe the age- or stage-  
27 structured demography of organisms and usually represent the life history of a  
28 population during a particular time frame at a specific geographic location.
- 29 2. The COMPADRE Plant Matrix Database and COMADRE Animal Matrix Database  
30 are the most extensive resources for MPM data, collectively containing >12,000  
31 individual projection matrices for >1,100 species globally. Although these databases  
32 represent an unparalleled resource for researchers, land managers, and educators, the  
33 current computational tools available to answer questions with MPMs impose  
34 significant barriers to potential COM(P)ADRE database users by requiring advanced  
35 knowledge to handle diverse data structures and program custom analysis functions.
- 36 3. To close this knowledge gap, we present two interrelated R packages designed to (i)  
37 facilitate the use of these databases by providing functions to acquire, quality control,  
38 and manage both the MPM data contained in COMPADRE and COMADRE, and a  
39 user's own MPM data (**Rcompadre**), and (ii) present a range of functions to  
40 calculate life history traits from MPMs in support of ecological and evolutionary  
41 analyses (**Rage**). We provide examples to illustrate the use of both.
- 42 4. **Rcompadre** and **Rage** will facilitate demographic analyses using MPM data and  
43 contribute to the improved replicability of studies using these data. We hope that this  
44 new functionality will allow researchers, land managers, and educators to unlock the  
45 potential behind the thousands of MPMs and ancillary metadata stored in the  
46 COMPADRE and COMADRE matrix databases, and in their own MPM data.

47 Keywords: Ageing, Age-structured population model, Life history strategy, Matrix  
48 population model, Population projection model, Population dynamics, Stage-structured  
49 population model

## 50 **Introduction**

51 Matrix population models (MPMs, hereafter) have become a commonplace tool for  
52 ecologists, evolutionary biologists, and conservation biologists seeking to understand how  
53 variation in vital rates (e.g., survival, development, reproduction, recruitment, etc.) in the life  
54 cycle varies geographically and across species. MPMs describe population dynamics based  
55 on stage- or age-specific vital rates in the population of interest over their life cycle (Caswell,  
56 2001). Outputs derived from MPMs include population growth rates (Caswell, 2001), key  
57 life-history traits (Caswell, 2001), and vital rate sensitivities (de Kroon, Plaisier, van  
58 Groenendael, & Caswell, 1986; de Kroon, van Groenendael, & Ehrlén, 2000). These outputs  
59 each have a well-understood biological interpretation, which allows comparison of MPM-  
60 derived population and life history metrics, and thus demography across the diversity of life  
61 on Earth, from moss (e.g., Okland, 1995) to monkeys (e.g., Morris et al., 2011) to microbes  
62 (e.g., Jouvét, Rodríguez-Rojas, & Steiner, 2018), and in myriad ecoregions.

63 Since the introduction of MPMs in the 1940s (Leslie, 1945, 1948), researchers have  
64 published thousands of MPMs for thousands of species. Our team has been digitising these  
65 MPMs into centralised databases for plants (the COMPADRE Plant Matrix Database:  
66 Salguero-Gómez et al., 2015) and animals (the COMADRE Animal Matrix Database:  
67 Salguero-Gómez et al., 2016). These twin databases now contain more than 12,000 MPMs  
68 for more than 1,100 species (COMPADRE: 8,708 matrices for 757 species; COMADRE:  
69 3,317 matrices for 415 species, as of September 2021) and are regularly augmented with  
70 newly-published and newly-digitised records. The databases, their history, and the rationale

71 behind the data organisation are described in Salguero-Gómez et al. (2015) and Salguero-  
72 Gómez et al. (2016), respectively.

73 COMPADRE and COMADRE store and provide MPMs and their associated metadata in a  
74 hierarchical structure that, while efficient for distribution, can be both a barrier to use and an  
75 entry point for user errors. The primary component of MPMs are the two-dimensional,  
76 square projection matrices, and the size of these matrices can vary widely across species and  
77 studies. Moreover, most projection matrices (**A**) in the databases are partitioned into their  
78 three constituent process-based submatrices such that  $\mathbf{A} = \mathbf{U} + \mathbf{F} + \mathbf{C}$ . Here, submatrix **U**  
79 describes transitions related to survival and growth/development, submatrix **F** describes  
80 sexual reproduction, and submatrix **C** describes clonal reproduction. Thus, in most cases,  
81 each MPM is represented by these four matrices (**A**, the main projection matrix and the  
82 submatrices **U**, **F** and **C**) alongside information about the life cycle stages used in the MPM.  
83 In the majority of cases, the projection interval (time step) for the MPM is one year, but this  
84 can vary considerably depending on the life history of the organism concerned (for example,  
85 five year intervals are common in tree MPMs). Each MPM in the databases is also associated  
86 with over 40 metadata variables extracted from its parent original work(s) (e.g., stage  
87 definitions, projection time steps, citation, taxonomy, geography, etc., detailed in Salguero-  
88 Gómez et al., 2015 & 2016). This nested structure allows for higher digitisation fidelity and  
89 distribution efficiency, but also means that the dataset cannot be imported by ordinary  
90 spreadsheet software, such as Excel, which accommodate only rectangular (or “flat”) data  
91 structures. Both of the most common tools for working with MPMs, the R statistical  
92 programming language (R Core Team, 2021) and Matlab (Matlab, 2010), readily accept  
93 hierarchical data structures. However, users must have a familiarity with handling a range of  
94 nested object classes to organise the databases to suit their needs (e.g., “*subset to only*  
95 *primates*” or “*subset to only species from tropical ecoregions*”). The higher dimensionality

96 can increase the risk of errors, such as using the wrong data dimension, even for experienced  
97 users.

98 The R package ecosystem provides a wide range of tools for analysing population dynamics  
99 from MPMs within individual populations. For example, **popdemo** (Stott, Hodgson, &  
100 Townley, 2012) focuses on the calculation of metrics related to transient population dynamics  
101 and transfer function analyses; **popbio** (Stubben, Milligan, & Others, 2007) provides  
102 functions to accomplish many (but not all) of the analyses found in the textbooks of Caswell  
103 (2001) and Morris & Doak (2002), such as the calculation of eigen properties (i.e., the  
104 asymptotic population growth rate, stable stage structure and reproductive values) or  
105 sensitivities and elasticities; **Rramas** (de la Cruz Rot, 2019) provides tools for making  
106 population projections and conducting population viability analyses from MPM data; and  
107 **lefko3** (Shefferson, Kurokawa, & Ehrlén, 2021) provides tools that allow the inclusion of  
108 information on individual histories, which could influence population dynamics, into MPM  
109 analyses (see Ehrlén, 2000). However, the tools for life history analysis provided by these  
110 existing packages are more limited, with among the most notable absence being important  
111 life history metrics based on age-from-stage calculations. Researchers that wanted to make  
112 such calculations (e.g., measures of senescence, longevity, or age at maturity) have needed to  
113 write their own code based on published equations in mathematics-heavy work, which has  
114 been a barrier to the broader adoption of these methods. Moreover, these life history metrics  
115 are often most meaningful in analyses across many populations or species. The existing  
116 packages provide little support for the large hierarchical data structures needed to apply  
117 analyses to hundreds or thousands of MPMs that may underlie a single comparative or  
118 macroecological analysis.

119 Here, we introduce two R packages that enable users to construct robust MPM analysis  
120 workflows to answer questions from single populations to across the tree of life. The first  
121 package, **Rcompadre**, is designed to facilitate acquisition, quality control, and management  
122 of the rich, hierarchical MPM data in COMPADRE and COMADRE. For example, this  
123 package includes tools to filter (subset) the databases based on metadata archived in these  
124 resources (e.g., by ecoregion, by taxonomic group). In addition to “base” style R syntax for  
125 these tasks, **Rcompadre** integrates **tidyverse** (Wickham et al., 2019) functionality to  
126 improve usability. The second package, **Rage**, builds on the enhanced data accessibility  
127 provided by **Rcompadre** by providing analysis pipeline support for arbitrarily large  
128 numbers of MPMs and the calculation of life history traits needed to support comparative  
129 analyses on this scale. These life history traits include life tables, mean life expectancy,  
130 generation time, among several others.

131 We showcase downloading, subsetting, and preparing MPM data for a broad comparative  
132 analysis using publicly-accessible data retrieved with **Rcompadre** (Box 1). We then  
133 illustrate an application of **Rage** to calculate ecologically and evolutionarily relevant metrics  
134 to test hypotheses related to life history theory at broad taxonomic scale. In doing so, we  
135 demonstrate the functional integration of **Rcompadre** and **Rage** and how investigators can  
136 use them in tandem to design workflows (Fig. 1) to answer their own questions in ecology,  
137 evolution and conservation biology.

## 138 **Rcompadre**

139 **Rcompadre** contains functions to facilitate downloading and using MPMs alongside their  
140 metadata from the COMPADRE and COMADRE databases (Fig. 1a). A central feature of  
141 this package is the definition of a new object class, `CompadreDB`, which allows R functions  
142 that are already familiar to users (e.g., `head` or **tidyverse** verbs) to be augmented with

143 ‘methods’ that ensure that they appropriately handle the structure of MPM data from the  
144 COM(P)ADRE databases. In addition to improving user-friendliness, the class definition  
145 provides a pathway for extending the compatibility of COM(P)ADRE data to other existing  
146 or future R functions. Briefly, the structure of `CompadreDB` objects uses the S4 systems<sup>1</sup>  
147 with two slots: (1) the `data` slot, which contains a `tibble`-style data frame (Wickham &  
148 Grolemund, 2016) with a list-column of MPMs and vector columns of metadata, and (2) the  
149 `version` slot which contains database version information for reproducibility, including the  
150 version number, date created, and a link to the database user agreement. In addition, we have  
151 created the `CompadreMat` class, which formally defines how MPMs are represented in a  
152 `CompadreDB` object. Here too, the use of an explicit class definition has allowed us to  
153 define how the data contained in the object will respond to familiar R functions. For example,  
154 users can access and replace columns of data using the standard `x$name` and `x$name <-`  
155 `value` methods, respectively. In addition, we provide the functionality to access the matrix  
156 data directly, for example, using the functions `matA` or `matU` to access all **A** matrices or **U**  
157 submatrices in the database as a list. This functionality is particularly convenient if the user  
158 wishes to apply functions to a large set of MPMs, as one would do in comparative and  
159 macroecological analysis (for example, see recent studies by Coutts et al. (2016), Takada &  
160 Kawai (2020), James et al. (2020), Healy et al. (2019), Capdevila et al. (2020) and Jones et al.  
161 (2020)). In addition to ‘base’ R functions, many data analysis workflows make use of  
162 functions in the **tidyverse** family of packages (Wickham et al., 2019). Our package  
163 includes “tidy” methods for `CompadreDB` objects, allowing users to `filter`, `arrange`,  
164 `mutate`, `select`, `summarise`, `rename` and `join` COM(P)ADRE data to answer their

---

<sup>1</sup> R includes significant support for object-oriented programming, and the S4 system is one of R’s systems for defining object classes. It is a stricter, less flexible system than R’s base system (S3) but has the advantage of enhancing consistency in how objects are defined and handled, and in the ease with which data can be accessed from nested objects. The details are far beyond the scope of this article, but see Wickham (2019) for fuller coverage.

165 study questions efficiently and at scale. The provision of these **tidyverse** methods also  
166 means that **Rcompadre** benefits from the piping (e.g., `%>%`) functionality of **magrittr**  
167 and more recently in base R (`|>`, in v.4.1.0 and later). Examples of how this functionality can  
168 streamline the human readability of workflows can be found in the vignettes at the package  
169 development pages.

170 In addition to a wide range of method-based support of existing R functions, **Rcompadre**  
171 provides functions for additional workflow tasks that follow the naming pattern of `cdb_`  
172 (pronounced “compadre database”) followed by a meaningful verb. For example,  
173 `cdb_fetch` retrieves COM(P)ADRE data of the current or any previous database version  
174 from the web as a `CompadreDB` object, and `cdb_compare` reports the differences between  
175 any pair of `CompadreDB` objects. Table 1 summarises the most important **Rcompadre**  
176 functions, and full documentation of all functions is provided in the package manual.

### 177 *Data management and checking*

178 The COM(P)ADRE databases include metadata associated with each MPM including  
179 taxonomic information, geolocation, and details of the source publication (see the User Guide  
180 at [www.compadre-db.org](http://www.compadre-db.org) or Salguero-Gomez et al. 2015, 2016 for full metadata  
181 documentation). When working with these data via **Rcompadre**, we can see the richness of  
182 the metadata with R’s `names` function and users can use any of these metadata columns to  
183 filter the database prior to analysis. The projection matrices themselves are contained in a list  
184 column called `mat`, where each element includes a list of the four matrices: **A** and the  
185 submatrices **U**, **F** and **C** (see above). The list also provides information on matrix stage  
186 definitions. All other columns of the COMADRE database object are ordinary vectors.



187 Not all COM(P)ADRE data will meet the inclusion criteria for a particular analysis.  
188 **Rcompadre** includes several general functions for checking the data that use the quality  
189 control flags generated when MPMs are digitised and checked before addition to the  
190 databases. These data checks are accessed through **Rcompadre** using the `cdb_flag`  
191 function. This function, which can be implemented as a stand-alone function or during data  
192 retrieval by `cdb_fetch`, adds logical metadata columns to the provided `CompadreDB`  
193 object which can be used for data filtering (see `?cdb_flag` for details of the available data  
194 property checks). For example, a minority of studies published only the main projection  
195 matrix, **A**, thereby preventing its decomposition into the **U**, **F** and **C** submatrices which may  
196 preclude certain demographic analyses. Matrices may also have missing (NA) values where a  
197 transition was not estimated. Other potential pitfalls flagged by this function include matrices  
198 that are singular (non-invertible), non-ergodic (where initial stage structure can influence  
199 asymptotic population growth rate), reducible (where the associated life cycle graph does not  
200 contain all necessary transition rates to enable pathways from all stages to all other stages) or  
201 non-primitive (Caswell, 2001; Stott, Townley, & Carslake, 2010). Depending on the desired  
202 downstream analyses, researchers may need to `filter` the database based on one or more of  
203 these flag columns.

204 The quality checks performed by `cdb_flag` cannot anticipate all potential inclusion criteria,  
205 and we strongly encourage investigators to perform additional checks that may be necessary  
206 to determine the suitability of a MPM record for their analysis. The existing metadata  
207 columns associated with each MPM contains a wealth of useful information to this end. For  
208 example, the interpretation of many metrics derived from MPMs depends on the projection  
209 interval (`ProjectionInterval`). We advise users to `filter` on this column to a  
210 common projection interval prior to analysis or to correct analysis outputs to the same  
211 temporal units. An analysis may also require delineating MPM records that use post- vs. pre-

212 reproductive census models. Although both databases have a metadata field that reports this  
213 information (`CensusType`), it is often not reported in original publications and thus  
214 COM(P)ADRE includes records with incomplete metadata. Users may therefore need to  
215 carefully consider the source publication (e.g., retrieved using the `DOI_ISBN` and  
216 `AdditionalSource` column metadata) or contact the original authors to determine  
217 suitability.

218 Finally, **Rcompadre** includes a function, `cdb_build_cdb`, which allows users to access  
219 the full functionality of **Rcompadre** for their own data by constructing valid `CompadreDB`  
220 objects from user-supplied lists of matrices, (optional) stage information, and an  
221 accompanying data frame of metadata. Furthermore, we provide a way for users to augment  
222 COM(P)ADRE with a `CompadreDB` object containing their own data using the function  
223 `cdb_rbind`. This nimble data extensibility ensures the continued utility of **Rcompadre**'s  
224 suite of workflow tools without dependency on externally-maintained data.

225 In **Box 1** we illustrate the use of **Rcompadre** to download, check, and filter the COMADRE  
226 database (animal MPMs) in preparation for a later analysis of mammal life span using **Rage**.  
227 Vignettes at the **Rcompadre** documentation website (<https://jonesor.github.io/Rcompadre/>)  
228 give further detailed coverage of the package's capabilities.

## 229 **Rage**

230 The **Rage** package contains functions to facilitate the calculation of life history metrics  
231 (Table 2) from MPMs. The guiding philosophy of the package centres on (i) augmenting the  
232 suite of life history analyses that are implemented in R and (ii) providing support for  
233 analyses—whether new in **Rage** or previously implemented elsewhere—to be conducted in a  
234 standardised way across large numbers of MPMs. Other functions are novel, such as

235 estimates of the pace and shape of reproduction (Baudisch & Stott, 2019). Broadly, the  
236 functions fall into six categories (Fig 1B, Table 2):

237 1) Transformation: reshape, resize, and reorder whole MPMs

238 2) Life tables: convert MPMs to life tables and life table components

239 3) Life history traits: calculate life history metrics

240 4) Vital rates: extract and summarise the component vital rates of MPMs

241 5) Visualisation: plot the life cycle graph

242 6) Perturbation analyses: calculate sensitivity and (stochastic) elasticity of any demographic  
243 statistic to perturbations of MPM elements, vital rates, or transition types

244 To illustrate the functionality and inter-compatibility of functions among these categories, we  
245 describe a workflow that reconciles a common problem in comparative life history analysis:  
246 the desired life history metric requires an age-structured life table, but the available data are  
247 stage-structured MPMs. Although the mathematical descriptions for each step have long been  
248 available in the demographic literature, **Rage** both implements these as R functions and does  
249 so in a way that enables interoperability of function inputs and outputs. We provide in-depth  
250 vignettes for each group of functions at the **Rage** documentation website  
251 (<https://jonesor.github.io/Rage/>). However, several **Rage** functions, such as  
252 `mpm_to_table`, `entropy_...` and `shape_...`, rest on the production of age-based  
253 life tables from stage-based matrices and thus it is pertinent to outline this important aspect of  
254 **Rage** here.

255 To enable a broader range of life history analyses on data from MPMs, **Rage** implements  
256 conversions of stage-structured MPMs to age-specific mortality and fertility life tables using

257 methods developed by Cochran and Ellner (1992), Caswell (2001) and Caswell et al. (2018).  
258 These methods require that MPMs are decomposed into their constituent submatrices, **U**, and  
259 optionally **F** and/or **C** (see above) and the determination of the stage we consider to be the  
260 start of the life cycle (e.g., seed establishment, seed germination, etc.). In a nutshell, the  
261 method works by an iterative procedure whereby a synthetic cohort starting at age zero is  
262 projected using the matrix model. At every iteration the cohort ages by one projection  
263 interval (often one year), and we can keep track of survivorship ( $l_x$ ), the proportion of the  
264 original cohort that have survived each iteration. Fecundity is calculated in an analogous way.  
265 The result is a full life table that is readily available for use in analyses that require age-,  
266 rather than stage-structured trajectories of demographic processes. We direct readers to  
267 Caswell (2001), Caswell et al. (2018) and in the supplementary information of Jones et al.  
268 (2014).

269 Once an  $l_x$  trajectory is calculated, the other quantities of standard life tables can be calculated  
270 using standard life table calculations (Preston, Heuveline, & Guillot, 2000). In **Rage**, the  
271 function `mpm_to_table` applies these calculations to produce a life table that includes  
272 standard life table columns including age, survivorship, age-specific probability of death,  
273 force of mortality, remaining life expectancy. In addition, **Rage** provides functionality to  
274 calculate age trajectories for individual variables (i.e., subsets of the full life table) using the  
275 `mpm_to_...` set of functions (e.g., `mpm_to_lx`; Box 1).

276 Importantly, converting MPMs to life tables can introduce mathematical artefacts that  
277 compromise the resulting analyses. **Rage** provides functions to diagnose and, when possible,  
278 correct for these artefacts. All age-from-stage calculations produce age-trajectories that  
279 inevitably asymptote as a mathematical consequence of describing the vital rates as functions  
280 of discrete stages (Horvitz & Tuljapurkar, 2008). Regardless of how low the survival

281 probabilities are in an MPM, there will be a non-zero probability that an individual could  
282 reach ages of 100, 10,000, or >1 million years. The exponential rate that these probabilities  
283 decay with increasing age is determined by the dominant eigenvalue of  $\mathbf{U}$ , but even rapid  
284 decay can bias some life history metrics (e.g., entropy and life span measures). **Rage**  
285 provides a convenient and principled way of correcting for this artefact by imposing a lower  
286 probability threshold defined by the degree of convergence to the quasi-stationary  
287 distribution (see also the Supplementary Information of Owen R. Jones et al., 2014). In **Rage**  
288 we do this by first scaling the right eigenvector ( $\mathbf{w}$ ) so that it sums to one and then, for each  
289 iteration of the age-from-stage calculations, we measure the convergence of the proportional  
290 cohort structure as  $\Delta_x = 0.5 \|\mathbf{p}_x - \mathbf{w}\|$ , where  $\mathbf{p}_x$  is the proportional stage structure at the  $x$ th  
291 iteration of the age-from-stage calculations (i.e., at time  $x$ ). When  $\mathbf{p}_x$  eventually converges to  
292 equal  $\mathbf{w}$ ,  $\Delta_x$  will equal 0. We can use this information to truncate the life tables produced from  
293 age-from-stage methods to, for example, ages where  $\Delta_x > 0.05$ . Furthermore, we may judge  
294 the reliability of age-from-stage methods by comparing the  $l_x$  trajectory with the  $\Delta_x$   
295 trajectory: If convergence is reached before  $l_x$  declines to, for example, 0.05 (i.e., 5% of the  
296 cohort remaining alive) we suggest reconsidering the use of this approach for that particular  
297 model.

298 In Box 2 we demonstrate the use of **Rage** via a global analysis of mammalian longevity  
299 introduced in Box 1. The life history metric of interest is calculated with **Rage**'s  
300 `longevity` function—a novel implementation in this package—by projecting a  
301 hypothetical cohort of individuals with an MPM until only a user-defined (default: 1%)  
302 fraction of individuals from the initial cohort remain alive. Since only a single cohort is  
303 tracked, the function requires only the  $\mathbf{U}$  submatrix (stage-specific survival and transition  
304 rates) as the demographic process input, which may be supplied directly by the user or  
305 extracted from a `CompadreDB` object using the `matU` function from `Rcompadre`.

306 The `longevity` function also requires us to define which stage we consider to be the start  
307 of the life cycle. This is fairly clear for most mammals but may be more subjective in some  
308 groups depending on the goals of the analysis (e.g., seed maturation *vs* germination for plants  
309 with a persistent seed bank). The **Rcompadre** function `mpm_first_active` facilitates  
310 scaling this task across a large number of MPMs by returning an integer index for the first  
311 active stage class (i.e., non-dormant), as defined by the original study author of the MPM.  
312 Like the results of `Rcompadre::cdb_flag`, we intend this to be used as a guide—not a  
313 replacement—for careful evaluation of suitability. It may be more appropriate to identify the  
314 start of life manually in some cases. Users may control the cohort survivorship threshold via  
315 the argument `lx_crit`. The default, 0.01 (=1%) may not be suitable for all organisms, and  
316 users may find that exploring other quantiles (e.g., 50%) offers a richer description of the  
317 age-at-death distribution. Finally, the function requires us to set a maximum age to consider  
318 (`xmax`, default = 1000) as a pragmatic matter of computational speed. This default can be  
319 increased for exceptionally long-lived organisms, and we remind users that all measures of  
320 age in the **Rage** package use the projection interval of the MPM provided (see the  
321 `ProjectionInterval` metadata column for COM(P)ADRE data retrieved using  
322 `Rcompadre::cdb_fetch`).

## 323 **Conclusions**

324 The tools provided by **Rcompadre** and **Rage** facilitate efficient and at-scale use of an  
325 unrivalled database of demographic process rates and the calculation of numerous life history  
326 and demographic metrics that are useful in ecology and evolution. In so doing, this pair of  
327 packages fills gaps and reduces overhead in the analytical workflow of comparative and  
328 macroecological demographic analysis. Although we designed the packages to operate  
329 together, **Rage** is also well-suited for general use with non-COM(P)ADRE matrix population

330 models, whether in support of the analysis of new empirical MPMs or simulation-based  
331 theoretical studies of life history. We showcase the use of these packages to illustrate how  
332 they may be particularly useful in comparative demographic studies, for example, to address  
333 topics related to the evolution of life histories or comparative population dynamics across  
334 many species.

335 Users can obtain a complete index of the functions available in **Rcompadre** and **Rage** by  
336 running `?Rcompadre` and `?Rage` respectively in R, or by visiting the package  
337 documentation websites at <https://jonesor.github.io/Rcompadre/> and  
338 <https://jonesor.github.io/Rage/>, respectively. Our ultimate hope is that democratising access  
339 to demographic data and analytic tools will empower a wide range of users to unlock the  
340 great potential of matrix population models. This will allow the community to further our  
341 basic understanding of life history, enable data-driven conservation management, and educate  
342 and inspire the next generation of population biologists.

### 343 **Acknowledgements**

344 We are grateful to the Max Planck Institute for Demographic Research for funding a  
345 workshop in winter 2017 to kickstart the development of these R packages. We thank the  
346 many attendees of our teaching workshops at numerous conferences, including the annual  
347 meetings of the British Ecological Society, Evolutionary Demography Society, International  
348 Convention for Conservation Biology, and the Ecological Society of America. They inspired  
349 much of the functionality of these R packages. ORJ was supported by the Independent  
350 Research Fund Denmark (DFR-6108-00467). RS-G was supported by a NERC Independent  
351 Research Fellowship (NE/M018458/1). JC-C, ORJ, RS-G, CCT, and CS were supported by  
352 an NSF Advances in Bioinformatics Development Award (#DBI-1661342). We thank D.  
353 Buss, J. Jones, J. Metcalf, H. Caswell and B. Kendall for contributing pieces of code and/or

354 advice at early stages of this project. We are also grateful to Y. Vindenes and two anonymous  
355 reviewers for constructive comments on an earlier draft of our manuscript.

356 **Authors contributions**

357 ORJ and RS-G conceived the packages. ORJ, PB, IS, TJ, WKP, JC-C, SL, GR, CCT, CS, PC,  
358 JJ and RS-G wrote code and/or contributed to documentation. IS designed the logos and JJ  
359 and PC created Fig. 1. ORJ led the writing of the manuscript, and all authors contributed to  
360 the drafts and gave final approval to publication.

361 **Data availability**

362 Data used in the examples presented here are publicly available from [www.compadre-db.org](http://www.compadre-db.org).

363

364



## 365 **Box 1: Using Rcompadre to download and prepare MPM data for analysis**

366 In the following example, we illustrate the use of `Rcompadre` to carry out typical data  
367 download and preparation tasks for an analysis relevant to comparative population dynamics  
368 research. Specifically, we aim towards an analysis of mammalian life span and its  
369 relationship with generation time (continued in **Box 2**).

370 After loading the required packages, we download the COMADRE data and conduct some  
371 basic checks of the matrices. We then filter the data set to include only mammals, to include  
372 no missing values in the **U** matrix, and to ensure that the **U** and **F** matrices are not filled  
373 entirely with zero values, nor that columns of the **U** matrix sum to 0. We further filter the data  
374 to ensure that the projection interval is 1 year. Finally, we can plot the geographic distribution  
375 of these data using tools from the `ggplot2` and `maps` packages (Fig. 2).

```
376 # Load packages
377 library(Rcompadre)
378 library(tidyverse)
379
380 # Fetch data, and conduct basic checks
381 comadre <- cdb_fetch("comadre", flag = TRUE)
382
383 # Filter for mammals, split matrices, NA/0 values in U and F
384 # matrices and a
385 # projection interval of 1
386 mammals <- comadre %>%
387   filter(Class == "Mammalia") %>%
388   filter(MatrixSplit == "Divided") %>%
389   filter(
390     check_NA_U == FALSE, check_zero_U == FALSE,
391     check_zero_F == FALSE, check_zero_U_colsum == FALSE
392   ) %>%
393   filter(ProjectionInterval == 1)
394
395 # Plot geographic distribution
396 ggplot(mammals, aes(x = Lon, y = Lat)) +
397   borders(database = "world", fill = "grey80", col = NA) +
398   geom_point(alpha = 0.4, color = "#E69F00") +
399   scale_x_continuous(breaks = seq(-180, 180, 90), expand = c(0, 0))
400 +
401   scale_y_continuous(expand = c(0, 0)) +
```

```
402 labs(x = "Longitude", y = "Latitude") +  
403 theme_minimal()
```

```
404
```

## 405 **Box 2: Using Rage to calculate and visualise longevity**

406 Here we demonstrate the use of **Rage**, focussing on the global analysis of mammalian  
407 longevity introduced in **Box 1**. We begin our mammal longevity analysis by adding columns  
408 to the data extracted from COMADRE (Box 1) that contain the two user-supplied arguments,  
409 `matU` and `start_life`, using the `dplyr` function `mutate`. We can then pair `mutate` with  
410 the base R function `mapply` to call the `longevity` function with each row's `matU` and  
411 `start_life` arguments and return the estimated longevity in a new column. Then we check  
412 the age of convergence to the quasi-stationary stage distribution (QSD), and `filter` the data  
413 set so that it only includes matrices where the estimated longevity is less than or equal to the  
414 age at which QSD is reached.

```
415 # Load package
416 library(Rage)
417
418 # Add columns for matU and matF, then calculate generation time,
419 longevity and
420 # convergence
421 # Filter to ensure that QSD is not reached before estimated
422 longevity.
423 mammals <- mammals %>%
424   mutate(
425     matU = matU(.),
426     start_life = mpm_first_active(.)
427   ) %>%
428   mutate(
429     matF = matF(.),
430     start_life = mpm_first_active(.)
431   ) %>%
432   mutate(gentime = mapply(gen_time, matU, matF)) %>%
433   mutate(longevity = mapply(longevity, matU)) %>%
434   mutate(convage = mapply(qsd_converge, matU)) %>%
435   filter(longevity - convage <= 0)
436
437 library(khroma)
438 ggplot(mammals, aes(x = gentime, y = longevity)) +
439   geom_point(aes(colour = Order)) +
440   scale_color_manual(values =
441     c(as.vector(colour("bright")(7)), "black")) +
442   scale_x_continuous(trans = "log", breaks = c(2, 5, 10, 20, 40,
443     80)) +
```

```
443   scale_y_continuous(trans = "log", breaks = c(2, 5, 10, 20, 40, 80,  
444 160)) +  
445   labs(x = "Generation time (years)", y = "Longevity (years)") +  
446   geom_smooth(method = "lm", colour = "grey50") +  
447   theme_minimal()  
448 #> `geom_smooth()` using formula 'y ~ x'
```

449 As one might expect, there is a strong association between generation time and our measure  
450 of life span (Fig. 3). It would of course be interesting to use more formal statistical methods  
451 to explore this (and similar relationships) further, for example to examine the variation in the  
452 scaling relationship across orders. When doing so it will be important to carefully consider  
453 taxonomic and geographic or ecoregion bias in the dataset. In addition, researchers should  
454 carefully vet the included data for suitability - including a consideration of whether the  
455 models are based on pre- or post-reproduction censuses.

456

457

458 **Supplementary materials**

459 We provide several vignettes which guide users through most of the functionality of  
460 Rcompadre and Rage. These vignettes are available at the package development web pages at  
461 <https://jonesor.github.io/Rcompadre/> and <https://jonesor.github.io/Rage/>, under “Articles”, in  
462 the dropdown menu.

463 **Rcompadre:**

- 464 1. Getting started with Rcompadre
- 465 2. Using Rcompadre with the tidyverse
- 466 3. Vectorising with Rcompadre
- 467 4. Obtaining references
- 468 5. Using your own matrix data

469 **Rage:**

- 470 1. Getting started with Rage
- 471 2. Deriving vital rates from an MPM
- 472 3. Deriving life history traits from an MPM
- 473 4. Age-from-stage analyses
- 474 5. Suggested quality control

475 An additional piece of supplementary material is a version of the code in Boxes 1 and 2 that  
476 does not use pipes: *non\_piped\_version.pdf*

477 **References**

- 478 Baudisch, A. (2011). The pace and shape of ageing. *Methods in Ecology and Evolution*, 2(4),  
479 375–382.
- 480 Baudisch, A., & Stott, I. (2019). A pace and shape perspective on fertility. *Methods in*  
481 *Ecology and Evolution*, 10(11), 1941–1951.
- 482 Capdevila, P., Beger, M., Blomberg, S. P., Hereu, B., Linares, C., & Salguero-Gómez, R.  
483 (2020). Longevity, body dimension and reproductive mode drive differences in aquatic  
484 versus terrestrial life-history strategies. *Functional Ecology*, 34(8), 1613–1625.
- 485 Caswell, H. (2001). *Matrix Population Models*. Sinauer Associates Incorporated.
- 486 Caswell, H., de Vries, C., Hartemink, N., Roth, G., & van Daalen, S. F. (2018). Age × stage-  
487 classified demographic analysis: a comprehensive approach. *Ecological Monographs*,  
488 88(4), 560–584.
- 489 Cochran, M. E., & Ellner, S. (1992). Simple methods for calculating age-based life history  
490 parameters for stage-structured populations. *Ecological Monographs*, 62(3), 345–364.
- 491 Coutts, S. R., Salguero-Gómez, R., Csergő, A. M., & Buckley, Y. M. (2016). Extrapolating  
492 demography with climate, proximity and phylogeny: approach with caution. *Ecology*  
493 *Letters*, 19(12), 1429–1438.
- 494 de Kroon, H., Plaisier, A., van Groenendael, J., & Caswell, H. (1986). Elasticity: The relative  
495 contribution of demographic parameters to population growth rate. *Ecology*, 67(5),  
496 1427–1431.
- 497 de Kroon, H., van Groenendael, J., & Ehrlén, J. (2000). Elasticities: A review of methods and  
498 model limitations. *Ecology*, 81(3), 607–618.
- 499 de la Cruz Rot, M. (2019). Rramas: Matrix Population Models. Retrieved from  
500 <https://CRAN.R-project.org/package=Rramas>
- 501 Demetrius, L. (1978). Adaptive value, entropy and survivorship curves. *Nature*, 275(5677),

- 502 213–214.
- 503 Demetrius, L., & Gundlach, V. (2014). Directionality Theory and the Entropic Principle of  
504 Natural Selection. *Entropy*, *16*(12), 5428–5522.
- 505 Ehrlén, J. (2000). The dynamics of plant populations: Does the history of individuals matter?  
506 *Ecology*, *81*(6), 1675–1684.
- 507 Franco, M., & Silvertown, J. (2004). A comparative demography of plants based on  
508 elasticities of vital rates. *Ecology*, *85*(2), 531–538.
- 509 Healy, K., Ezard, T. H. G., Jones, O. R., Salguero-Gómez, R., & Buckley, Y. M. (2019).  
510 Animal life history is shaped by the pace of life and the distribution of age-specific  
511 mortality and reproduction. *Nature Ecology & Evolution*, *3*(8), 1217–1224.
- 512 Horvitz, C. C., & Tuljapurkar, S. (2008). Stage dynamics, period survival, and mortality  
513 plateaus. *The American Naturalist*, *172*(2), 203–215.
- 514 James, T. D., Salguero-Gómez, R., Jones, O. R., Childs, D. Z., & Beckerman, A. P. (2020).  
515 Bridging gaps in demographic analysis with phylogenetic imputation. *Conservation*  
516 *Biology*. doi:10.1111/cobi.13658
- 517 Jones, O. R., Ezard, T. H. G., Dooley, C., Healy, K., Hodgson, D. J., Mueller, M., ...  
518 Salguero-Gómez, R. (2020). My family and other animals: Human demography under a  
519 comparative cross-species lens. In O. Burger, R. Lee, & R. Sear (Eds.), *Human*  
520 *Evolutionary Demography* (pp. 1–31). OSF.
- 521 Jones, O. R., Scheuerlein, A., Salguero-Gómez, R., Camarda, C. G., Schaible, R., Casper, B.  
522 B., ... Vaupel, J. W. (2014). Diversity of ageing across the tree of life. *Nature*,  
523 *505*(7482), 169–173.
- 524 Jouvett, L., Rodríguez-Rojas, A., & Steiner, U. K. (2018). Demographic variability and  
525 heterogeneity among individuals within and among clonal bacteria strains. *Oikos*,  
526 *127*(5), 728–737.

- 527 Keyfitz, N. (1977). *Applied Mathematical Demography*. New York, NY: Springer Science &  
528 Business Media.
- 529 Keyfitz, N., & Caswell, H. (2005). *Applied Mathematical Demography*. New York: Springer  
530 Science & Business Media.
- 531 Leslie, P. H. (1945). On the use of matrices in certain population mathematics. *Biometrika*,  
532 33, 183–212.
- 533 Leslie, P. H. (1948). Some Further Notes on the Use of Matrices in Population Mathematics.  
534 *Biometrika*, 35(3/4), 213–245.
- 535 Matlab. (2010). *version 7.10.0 (R2010a)*. Natick, Massachusetts: The MathWorks Inc.
- 536 Morris, W. F., Altmann, J., Brockman, D. K., Cords, M., Fedigan, L. M., Pusey, A. E., ...  
537 Strier, K. B. (2011). Low Demographic Variability in Wild Primate Populations: Fitness  
538 Impacts of Variation, Covariation, and Serial Correlation in Vital Rates. *American*  
539 *Naturalist*, 177(1), E14–E28.
- 540 Morris, W. F., & Doak, D. F. (2002). *Quantitative Conservation Biology*. Sunderland MA,  
541 USA: Sinauer.
- 542 Okland, R. H. (1995). Population biology of the clonal moss *Hylocomium splendens* in  
543 Norwegian boreal spruce forests. I. Demography. *Journal of Ecology*, 83(4), 697–712.
- 544 Preston, S., Heuveline, P., & Guillot, M. (2000). *Demography: Measuring and Modeling*  
545 *Population Processes*. Wiley.
- 546 R Core Team. (2021). R: A Language and Environment for Statistical Computing. Vienna,  
547 Austria: R Foundation for Statistical Computing. Retrieved from [https://www.R-](https://www.R-project.org/)  
548 [project.org/](https://www.R-project.org/)
- 549 Salguero-Gómez, R., Jones, O. R., Archer, C. R., Bein, C., de Buhr, H., Farack, C., ...  
550 Vaupel, J. W. (2016). COMADRE: a global database of animal demography. *Journal of*  
551 *Animal Ecology*, 85(2), 371–384.



- 552 Salguero-Gómez, R., Jones, O. R., Archer, C. R., Buckley, Y. M., Che-Castaldo, J., Caswell,  
553 H., ... Vaupel, J. W. (2015). The COMPADRE Plant Matrix Database: an open online  
554 repository for plant demography. *Journal of Ecology*, *103*(1), 202–218.
- 555 Salguero-Gómez, R., & Plotkin, J. B. (2010). Matrix dimensions bias demographic  
556 inferences: implications for comparative plant demography. *American Naturalist*,  
557 *176*(6), 710–722.
- 558 Shefferson, R. P., Kurokawa, S., & Ehrlén, J. (2021). lefko3 : Analysing individual history  
559 through size-classified matrix population models. *Methods in Ecology and Evolution*.  
560 doi:10.1111/2041-210x.13526
- 561 Stott, I., Hodgson, D. J., & Townley, S. (2012). popdemo : an R package for population  
562 demography using projection matrix analysis: popdemo : an R package. *Methods in*  
563 *Ecology and Evolution*, *3*(5), 797–802.
- 564 Stott, I., Townley, S., & Carslake, D. (2010). On reducibility and ergodicity of population  
565 projection matrix models. *Methods in Ecology and Evolution*. *1* (3), 242-252
- 566 Stubben, C., Milligan, B., & Others. (2007). Estimating and analyzing demographic models  
567 using the popbio package in R. *Journal of Statistical Software*, *22*(11), 1–23.
- 568 Takada, T., & Kawai, Y. (2020). An analysis of elasticity vector distribution specific to  
569 semelparous species using randomly generated population projection matrices and the  
570 COMPADRE Plant Matrix Database. *Ecological Modelling*, *431*, 109125.
- 571 Wickham, H. (2019). *Advanced R, Second Edition*. CRC Press.
- 572 Wickham, H., Averick, M., Bryan, J., Chang, W., McGowan, L., François, R., ... Yutani, H.  
573 (2019). Welcome to the tidyverse. *Journal of Open Source Software*, *4*(43), 1686.
- 574 Wickham, H., & Grolemund, G. (2016). *R for Data Science: Import, Tidy, Transform,*  
575 *Visualize, and Model Data*. Sebastopol, CA, USA: O'Reilly Media, Inc.

576

577 Figure captions

578

579 Figure 1. Workflow of using **Rcompadre** and **Rage** for ecological and evolutionary  
580 analyses of matrix population model data. **(A)** Once the author(s) have identified the research  
581 question, demographic data in the format of MPMs can be accessed from the COMPADRE  
582 and/or COMADRE databases via the **Rcompadre** R package. This package allows for the  
583 online acquisition, checking (according to data needs) and management of the `CompadreDB`  
584 data object (e.g., using `cdb_fetch` to download the data and `cdb_flag` and  
585 `filter/subset` to produce a data set for analysis). **(B)** The filtered data (or other user-  
586 provided MPM data) can be then migrated for calculations of life history traits with **Rage**  
587 (alternatively, these can be done directly on MPMs provided by the author). The families of  
588 functions archived in **Rage** include: transformation (e.g., `mpm_collapse`), creation of life  
589 tables (e.g., `mpm_to_lx`), derivation of life history traits (e.g., `longevity`), calculation of  
590 vital rates (e.g., using `vital_rates` to calculate average survival, reproduction,  
591 development, etc.), visualisation of life cycles (e.g., `plot_life_cycle`), and  
592 perturbation analyses (e.g., `perturb_stochastic`).

593

594

595 Figure 2. The spatial extent of data in the subset of mammal data used in our example  
596 analysis. Note that 186 of the matrices for mammals in our set (~27%) lack associated spatial  
597 information.

598

599

600 Figure 3. The relationship between estimated generation time and longevity (defined as the  
601 age that 1% of a synthetic cohort would reach, based on the MPM). The line represents the fit  
602 of an ordinary least-squared regression through the data. The slope is 1.28 ( $\pm 0.07$ ) and the  
603 intercept is 0.26 ( $\pm 0.16$ );  $R^2=0.90$ ;  $F_{1,43}= 379$ ;  $p < 0.001$ ).

604

605

606 Table 1. The functions in Rcompadre are grouped into four categories: Data acquisition, Data  
 607 checking, Data management and Accessor functions. We outline the most important  
 608 functions here, with a brief description. Users should consult the package documentation for  
 609 a full description of named functions (e.g., `?cdb_fetch`) and to see a full list of functions.

| Category         | Function                         | Description                                                                                                                                                                                                                           |
|------------------|----------------------------------|---------------------------------------------------------------------------------------------------------------------------------------------------------------------------------------------------------------------------------------|
| Data acquisition | <code>cdb_fetch()</code>         | Downloads the current version of the COMPADRE or COMADRE databases, or loads a local database file.                                                                                                                                   |
|                  | <code>cdb_metadata()</code>      | Extracts a tibble with only metadata from a <code>CompadreDB</code> object.                                                                                                                                                           |
| Data checking    | <code>cdb_collapse()</code>      | Collapses a <code>CompadreDB</code> object by averaging projection matrices over levels of one or more grouping variables.                                                                                                            |
|                  | <code>cdb_compare()</code>       | Compares two versions or subsets of <code>CompadreDB</code> objects                                                                                                                                                                   |
|                  | <code>cdb_flag()</code>          | Flags potential problems with projection matrices within a <code>CompadreDB</code> object, such as missing values, singular <b>U</b> submatrices, non-ergodicity, non-irreducibility, primitivity etc. (see Iain Stott et al., 2012). |
|                  | <code>cdb_check_species()</code> | Checks for specific species in a <code>CompadreDB</code> object.                                                                                                                                                                      |
| Data management  | <code>as_cdb()</code>            | Generates an S4 <code>CompadreDB</code> object from S3 formatted data.                                                                                                                                                                |
|                  | <code>cdb_flatten()</code>       | Converts a <code>CompadreDB</code> object into a flat data frame with projection matrices and vectors stored in string representation.                                                                                                |
|                  | <code>cdb_unflatten()</code>     | Converts a flattened data frame back into a <code>CompadreDB</code> object.                                                                                                                                                           |
|                  | <code>cdb_id()</code>            | Creates a vector of integer identifiers corresponding to unique combinations of a                                                                                                                                                     |

|                    |                                                                                                                                    |                                                                                                                                                                                                                                  |
|--------------------|------------------------------------------------------------------------------------------------------------------------------------|----------------------------------------------------------------------------------------------------------------------------------------------------------------------------------------------------------------------------------|
|                    |                                                                                                                                    | given set of columns.                                                                                                                                                                                                            |
|                    | <code>cdb_id_stages()</code>                                                                                                       | Creates a vector of integer identifiers corresponding to unique combinations of a species and matrix stage class definitions.                                                                                                    |
|                    | <code>cdb_id_studies()</code>                                                                                                      | Creates a vector of integer identifiers corresponding to unique combinations of publication metadata.                                                                                                                            |
|                    | <code>cdb_mean_matF()</code>                                                                                                       | Calculates a population specific mean fecundity submatrix ( <b>F</b> ) for each set of projection matrices in a <code>CompadreDB</code> object.                                                                                  |
|                    | <code>cdb_rbind()</code>                                                                                                           | Merges two <code>CompadreDB</code> objects using a row-bind of the data slots.                                                                                                                                                   |
|                    | <code>cdb_unnest()</code>                                                                                                          | Unnests a <code>CompadreDB</code> object by spreading the nested components of <code>CompadreMat</code> into separate columns.                                                                                                   |
|                    | <code>mat_mean()</code> ,<br><code>mpm_mean()</code>                                                                               | Calculates an element-wise mean over a list of projection matrices or <code>CompadreMat</code> objects.                                                                                                                          |
|                    | <code>mat_to_string()</code> ,<br><code>vec_to_string()</code> ,<br><code>string_to_mat()</code> ,<br><code>string_to_vec()</code> | Converts vectors or square numeric matrices to and from string representation.                                                                                                                                                   |
|                    | <code>mpm_has_prop()</code> ,<br><code>mpm_has_active()</code> ,<br><code>mpm_has_dorm()</code>                                    | Extracts stage-class information (e.g., propagule, dormant, and active stages) from a <code>CompadreMat</code> or <code>CompadreDB</code> object.                                                                                |
|                    | <code>mpm_first_active()</code>                                                                                                    | Extracts the integer index of the first active (i.e., non-dormant, non-seedbank) stage class in a <code>CompadreMat</code> or <code>CompadreDB</code> object.                                                                    |
| Accessor functions | <code>matA()</code> , <code>matU()</code> ,<br><code>matF()</code> , <code>matC()</code>                                           | Extracts full projection matrix ( <b>A</b> ), or the survival ( <b>U</b> ), sexual reproduction ( <b>F</b> ), or clonal reproduction ( <b>C</b> ) submatrices from a <code>CompadreMat</code> or <code>CompadreDB</code> object. |

611 Table 2. The functions in Rage are grouped into six categories: Life history traits, Life tables,  
 612 Vital rates, Perturbation analyses, MPM transformation, and Visualisation. We outline the  
 613 most important functions here with a brief description. Users should consult the package  
 614 documentation for a full description of named functions (e.g., `?life_expect_mean`) and  
 615 to see a complete list of functions.

| Category            | Function                                                                                     | Description                                                                                                                                                                                                 |
|---------------------|----------------------------------------------------------------------------------------------|-------------------------------------------------------------------------------------------------------------------------------------------------------------------------------------------------------------|
| Life history traits | <code>life_expect_mean()</code> ,<br><code>life_expect_var()</code>                          | Applies Markov chain approaches to obtain the mean and/or variance of life expectancy from a matrix population model.                                                                                       |
|                     | <code>longevity()</code>                                                                     | Calculates the age at which survivorship falls below some critical proportion from a matrix population model (see SI in Owen R. Jones et al., 2014).                                                        |
|                     | <code>net_repro_rate()</code>                                                                | Calculates net reproductive value ( $R_0$ ) from a matrix population model.                                                                                                                                 |
|                     | <code>gen_time()</code>                                                                      | Calculates generation time from a matrix population model.                                                                                                                                                  |
|                     | <code>mature_age()</code> ,<br><code>mature_distrib()</code> ,<br><code>mature_prob()</code> | Calculates the mean age at first reproduction, the stage distribution of individuals achieving reproductive maturity, and the probability of achieving reproductive maturity using Markov chain approaches. |
|                     | <code>entropy_d()</code>                                                                     | Calculates Demetrius' entropy (L. Demetrius, 1978) from vectors of age-specific survivorship ( $l_x$ ) and fecundity ( $m_x$ ).                                                                             |
|                     | <code>entropy_k()</code>                                                                     | Calculates Keyfitz's entropy (Keyfitz & Caswell, 2005) from a vector of age-specific survivorship ( $l_x$ ).                                                                                                |

|             |                                                                                                                                                                                                                             |                                                                                                                                                                                                                   |
|-------------|-----------------------------------------------------------------------------------------------------------------------------------------------------------------------------------------------------------------------------|-------------------------------------------------------------------------------------------------------------------------------------------------------------------------------------------------------------------|
|             | <code>shape_rep()</code>                                                                                                                                                                                                    | Calculates a 'shape' value for distribution of reproduction over age (Baudisch & Stott, 2019).                                                                                                                    |
|             | <code>shape_surv()</code>                                                                                                                                                                                                   | Calculates a 'shape' value for survival lifespan inequality (Baudisch, 2011).                                                                                                                                     |
| Life tables | <code>mpm_to_table()</code>                                                                                                                                                                                                 | Generates a life table from a matrix population model using age-from-stage decomposition methods (Cochran & Ellner, 1992; Caswell, 2001).                                                                         |
|             | <code>mpm_to_hx()</code> ,<br><code>mpm_to_lx()</code> ,<br><code>mpm_to_mx()</code> ,<br><code>mpm_to_px()</code>                                                                                                          | Calculates mortality hazard ( $h_x$ ), age-specific survivorship ( $l_x$ ), reproduction ( $m_x$ ), and survival probability ( $p_x$ ) from a matrix population model using age-from-stage decomposition methods. |
|             | <code>lx_to_px()</code> ,<br><code>lx_to_hx()</code> ,<br><code>px_to_lx()</code> ,<br><code>px_to_hx()</code> ,<br><code>hx_to_lx()</code> ,<br><code>hx_to_px()</code>                                                    | Converts between vectors of age-specific survivorship ( $l_x$ ), survival probability ( $p_x$ ), and mortality hazard ( $h_x$ ).                                                                                  |
|             | <code>qsd_converge()</code>                                                                                                                                                                                                 | Calculates the time for a cohort projected with a matrix population model to reach a defined quasi-stationary stage distribution (see SI in Owen R. Jones et al., 2014).                                          |
| Vital rates | <code>vitalRates()</code>                                                                                                                                                                                                   | Derives the mean vital rates for a matrix population model.                                                                                                                                                       |
|             | <code>vr_dorm_enter()</code> ,<br><code>vr_dorm_exit()</code> ,<br><code>vr_fecundity()</code> ,<br><code>vr_growth()</code> ,<br><code>vr_shrinkage()</code> ,<br><code>vr_stasis()</code> ,<br><code>vr_survival()</code> | Derives mean vital rates of survival, growth (or development), shrinkage (or de-development), stasis, dormancy, or reproduction from a matrix population model, by averaging across stage classes.                |
|             | <code>vr_vec_dorm_enter()</code> ,<br><code>vr_vec_dorm_exit()</code> ,<br><code>vr_vec_growth()</code> ,<br><code>vr_vec_reproduction()</code> ,<br><code>vr_vec_shrinkage()</code> ,                                      | Derives vectors of stage-specific vital rates of survival, growth, shrinkage, stasis, dormancy, or reproduction from a matrix population model.                                                                   |

|                       |                                                                  |                                                                                                                                                     |
|-----------------------|------------------------------------------------------------------|-----------------------------------------------------------------------------------------------------------------------------------------------------|
|                       | <code>vr_vec_stasis()</code> ,<br><code>vr_vec_survival()</code> |                                                                                                                                                     |
|                       | <code>vr_mat_R()</code> ,<br><code>vr_mat_U()</code>             | Derives survival-independent vital rates for growth, stasis, shrinkage, and reproduction.                                                           |
| Perturbation analyses | <code>perturb_matrix()</code>                                    | Perturbation analysis of an emerging demographic property (e.g., population growth rate, damping ratio) with respect to changes on matrix elements. |
|                       | <code>perturb_trans()</code>                                     | Perturbation analysis of transition types within a matrix population model.                                                                         |
|                       | <code>perturb_vr()</code>                                        | Perturbation analysis of underlying vital rates (Franco & Silvertown, 2004) in a matrix population model.                                           |
|                       | <code>perturb_stochastic()</code>                                | Perturbation analysis of an emerging demographic property (e.g., population growth rate, damping ratio) with respect to changes on matrix elements. |
| MPM transformation    | <code>mpm_collapse()</code>                                      | Collapses a matrix population model to a smaller number of stages using weighted averages (Salguero-Gómez & Plotkin, 2010).                         |
|                       | <code>mpm_rearrange()</code>                                     | Rearranges the stages of a matrix population model to segregate reproductive and non-reproductive stages.                                           |
|                       | <code>mpm_split()</code>                                         | Converts a matrix population model into survival ( <b>U</b> ), fecundity ( <b>F</b> ), and clonal ( <b>C</b> ) matrices.                            |
|                       | <code>mpm_standardize()</code>                                   | Transforms a matrix population model to a standardized set of stage classes.                                                                        |
|                       | <code>repro_stages()</code>                                      | Identifies which stages in a matrix population model are reproductive.                                                                              |
|                       | <code>standard_stages()</code>                                   | Identifies the stages of a matrix population model that correspond to different parts of                                                            |

the reproductive life cycle.

|               |                                |                                                            |
|---------------|--------------------------------|------------------------------------------------------------|
| Visualisation | <code>plot_life_cycle()</code> | Plots a life cycle diagram from a matrix population model. |
|---------------|--------------------------------|------------------------------------------------------------|

616

617



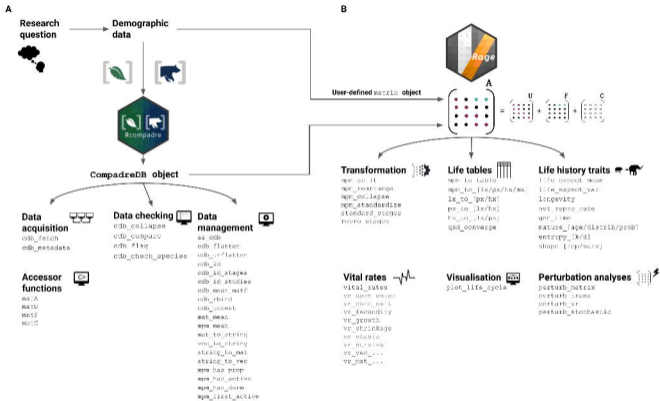

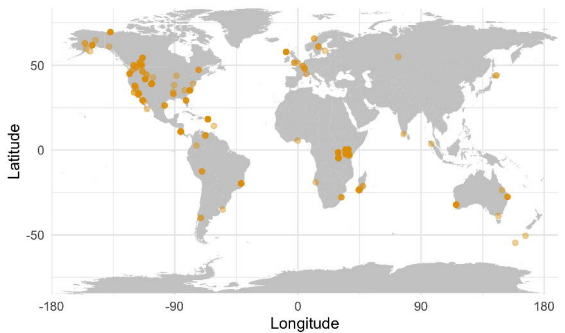

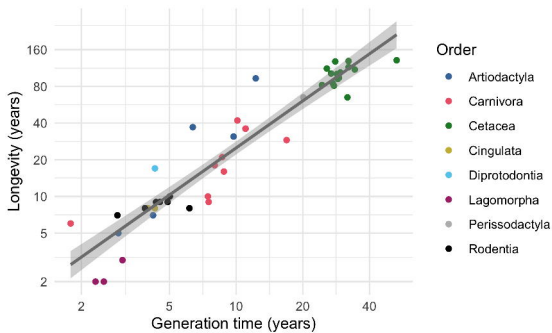

Source: https://www.biorxiv.org/content/10.1101/2021.04.26.441330v3.full.pdf
